# Supplementary material for: The intestinal intermediate filament network responds to and protects against microbial insults and toxins
Source: Oxford University Press journal article supplement (doi:10.1242/dev.169482), 2019-01-01
Supplement: dev169482supp.pdf [file dev169482supp.pdf]

## Supplementary Information

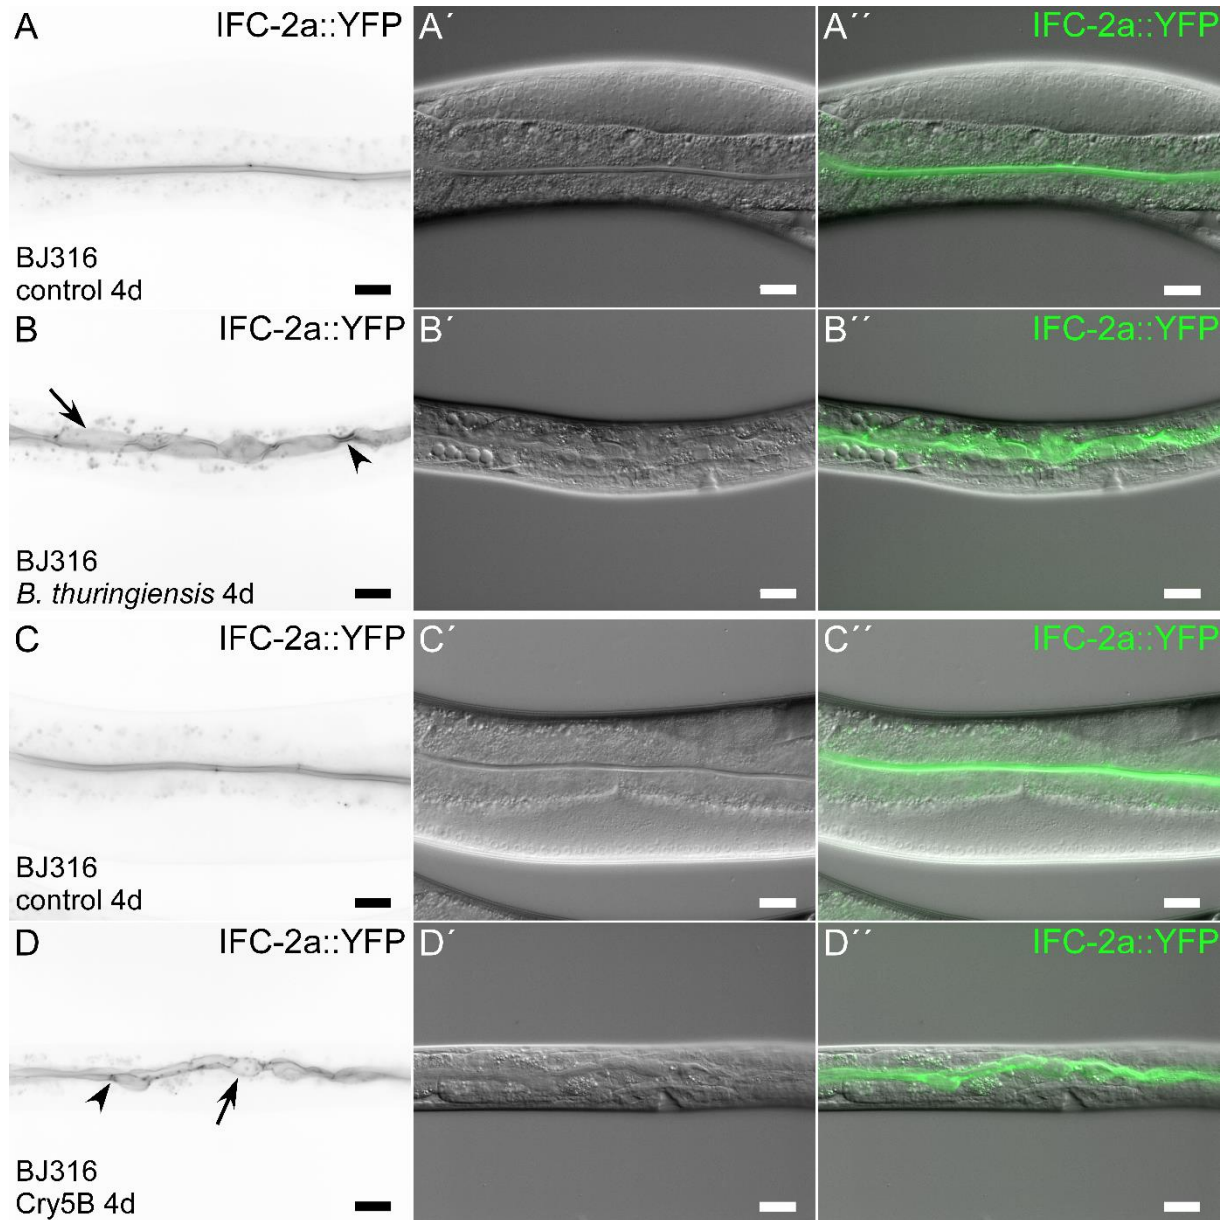

**Fig. S1. IFC-2a::YFP redistributes upon infection with *Bacillus thuringiensis* or intoxication with Cry5B.** The *in vivo* images show the distribution of the fluorescent IF protein IFC-2a::YFP that is produced from a *yfp*-tagged version of the endogenous *ifc-2a* gene (A-D; corresponding interference contrast images in A'-D'; merged images in A''-D''). Animals were grown for 4 days after hatching on OP50 (A-A''), *Bacillus thuringiensis* DB27 (B-B''), empty vector-containing control JM103 (C-C''), and Cry5B pore-forming toxin-producing JM103 (D-D''). Animals grown on control bacteria (OP50, control JM103) reach adulthood and display smooth periluminal localization of IFC-2a::YFP in the intestine (A-A'', C-C'') indistinguishable

from IFB-2a::CFP (Fig. 1C-C", E-E") indicating an intact intestinal lumen surrounded by a fully developed endotube. In contrast, infection with *Bacillus thuringiensis* DB27 (B-B") or intoxication with its pore-forming toxin Cry5B (D-D") induce intestinal lumen dilation and multiple cytoplasmic invaginations of the IF-rich endotube as also seen in the IFB-2a::CFP reporter strain (see Fig. 1D-D", F-F"). Scale bars: 20  $\mu$ m in A-D".

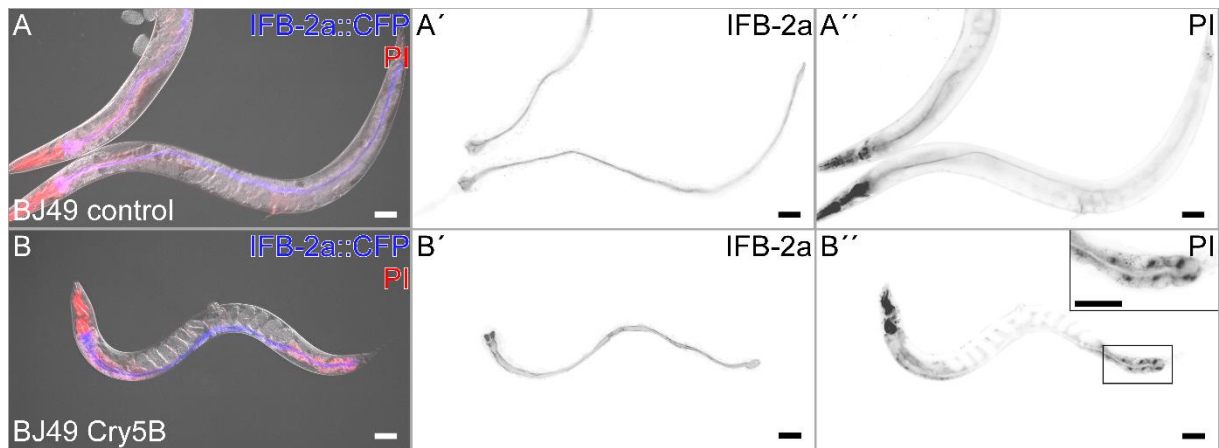

**Fig. S2. The pore-forming toxin Cry5B induces pores at the apical plasma membrane of the intestinal cells without affecting junctional tightness.** IFB-2a::CFP-producing reporter strain was first incubated either on control or on Cry5B-expressing JM103 for 24 hours. Animals were subsequently fed with the fluorescent tracer propidium iodide for 2 hours to assess intestinal integrity. The micrographs show that propidium iodide is retained in the intestinal lumen surrounded by a characteristic IFB-2a-positive endotube in the control (A-A'') but enters intestinal nuclei after Cry5B treatment, which has only elicited minor alterations in IFB-2a distribution at this time point (B-B''). Note that intercellular uptake of propidium iodide is not detectable indicating that the *C. elegans* apical junction is not affected by Cry5B intoxication. The uterine propidium iodide fluorescence in (A'' and B'') is caused by tracer uptake through the vulva. Scale bars: 50  $\mu$ m.

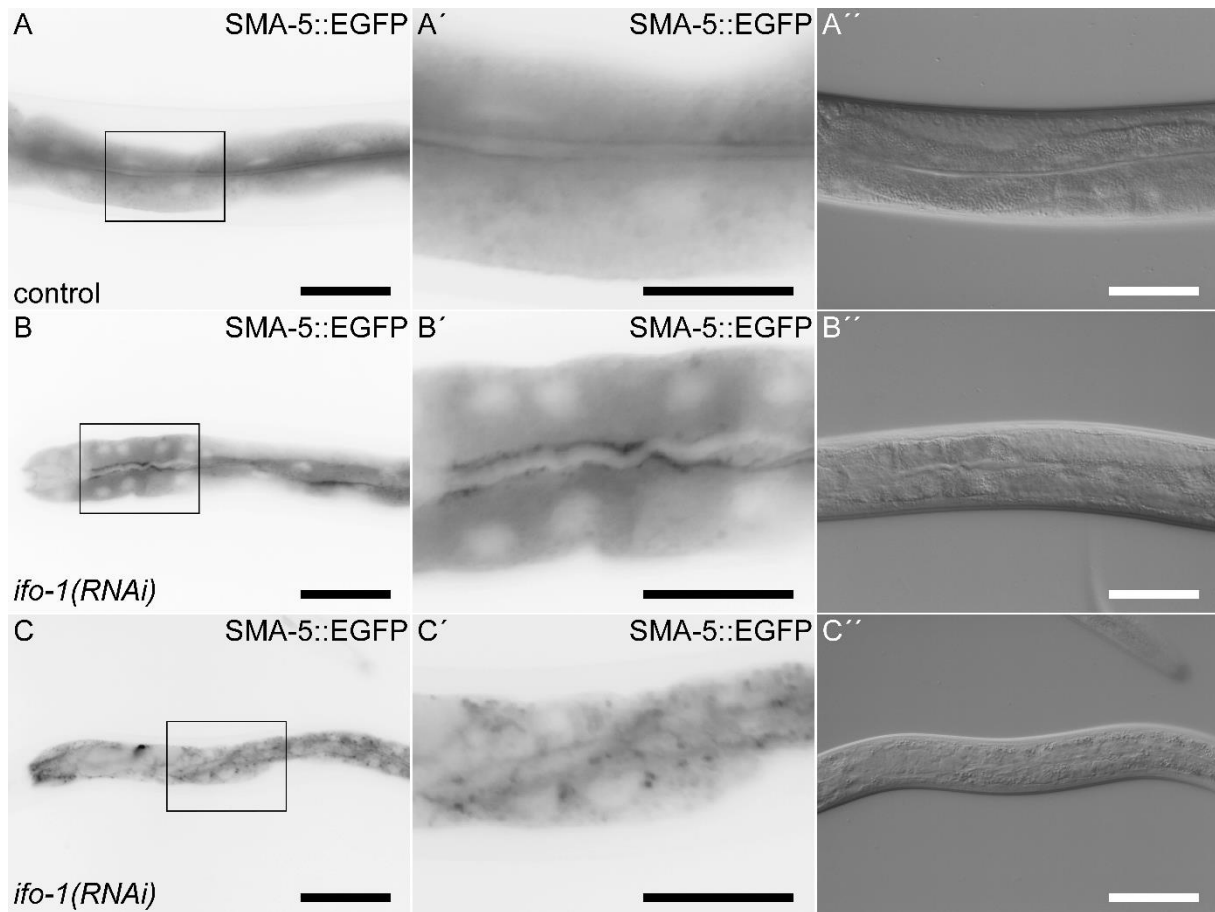

**Fig. S3. SMA-5 accumulates apically and in cytoplasmic dots in *ifo-1(RNAi)* animals.** The images (fluorescence micrographs in A-C with enlargements of boxed areas in A'-C' and corresponding interference contrasts in A''-C'') show that SMA-5::EGFP is uniformly localized in the intestinal cytoplasm and the apical plasma membrane of control animals (A-A'') but accumulates apically and in cytoplasmic dots in *ifo-1(RNAi)* intestines (B-C''). Note that the number of cytoplasmic dots appears to correlate with the strength of the RNAi-induced intestinal phenotype. Scale bar: 50  $\mu\text{m}$  in A, A'', B, B'', C, C'', 25  $\mu\text{m}$  in A', B', C'.

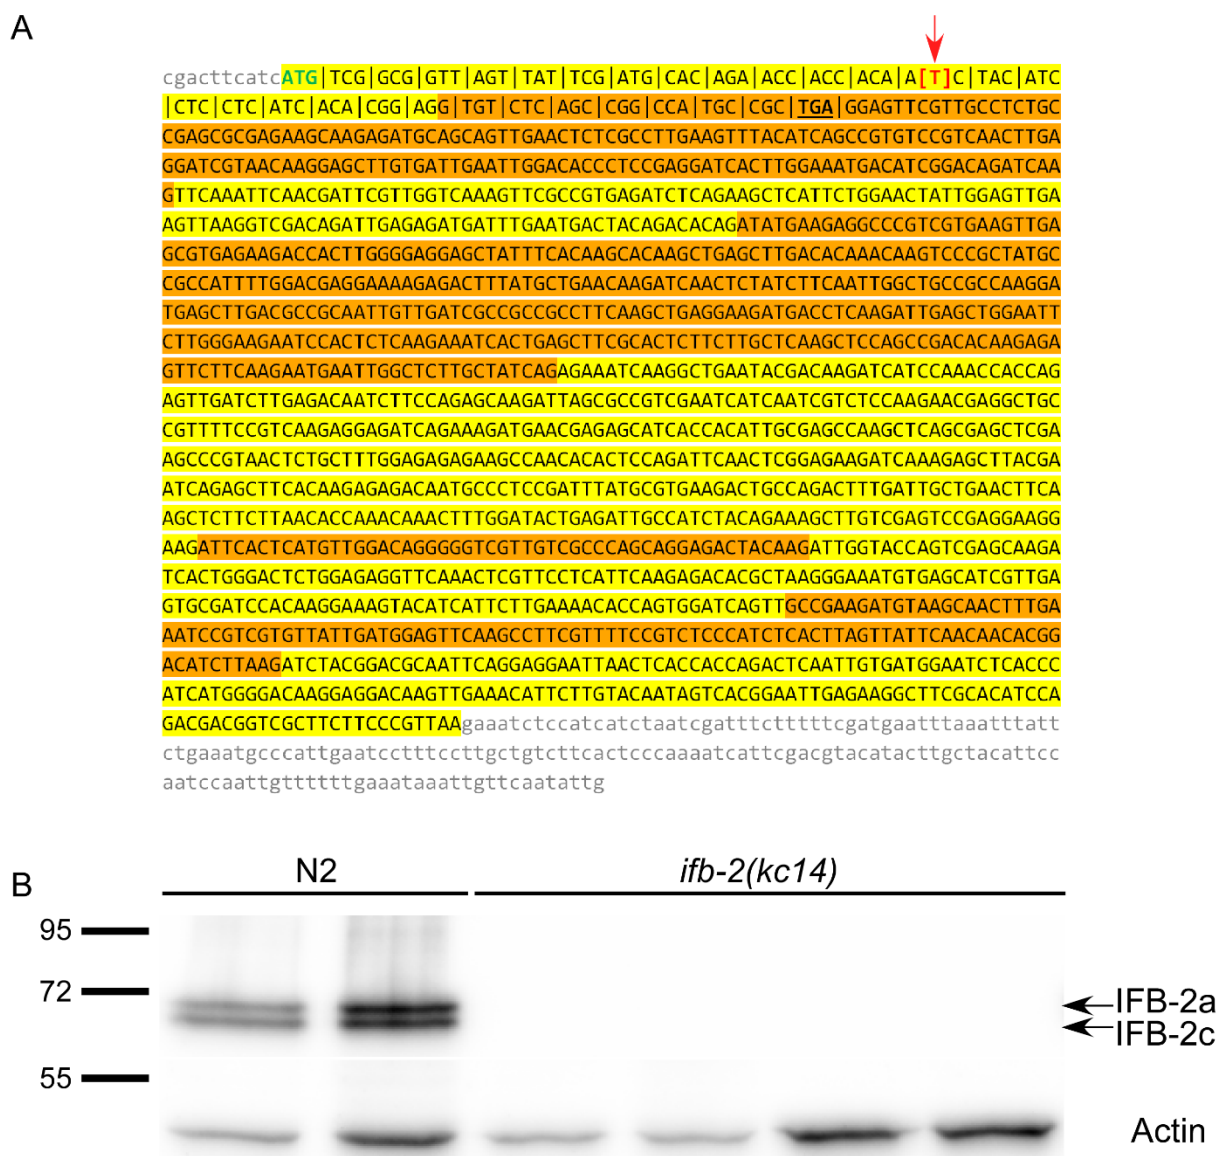

**Fig. S4. Genetic alterations of allele *ifb-2(kc14)* and immunoblot analysis of whole worm lysates detecting IFB-2 and actin in N2 and *ifb-2(kc14)*.** (A) shows the spliced gene model of *ifb-2* isoform a according to WormBase ([www.wormbase.org](http://www.wormbase.org); exons in alternating colors, non-translated region in grey letters, translational start codon in green). Mutant allele *ifb-2(kc14)* contains a thymidine insertion at position 41 (red arrow) leading to a premature stop in the second exon (TGA in bold) resulting in a truncated 29 amino acid-long protein encompassing only 13 of the most aminoterminal amino acids of IFB-2a. The mutation also affects all other known IFB-2 isoforms, which share the same start codon and the aminoterminal part encoded by the first five exons. (B) The immunoblot shows complete absence of both IFB-2 isoforms a and c in worms harboring the *ifb-2* knockout allele *kc14*. The blot was subsequently incubated with pan-actin antibodies (lower panel). The position of co-electrophoresed size markers are shown in kDa at left.

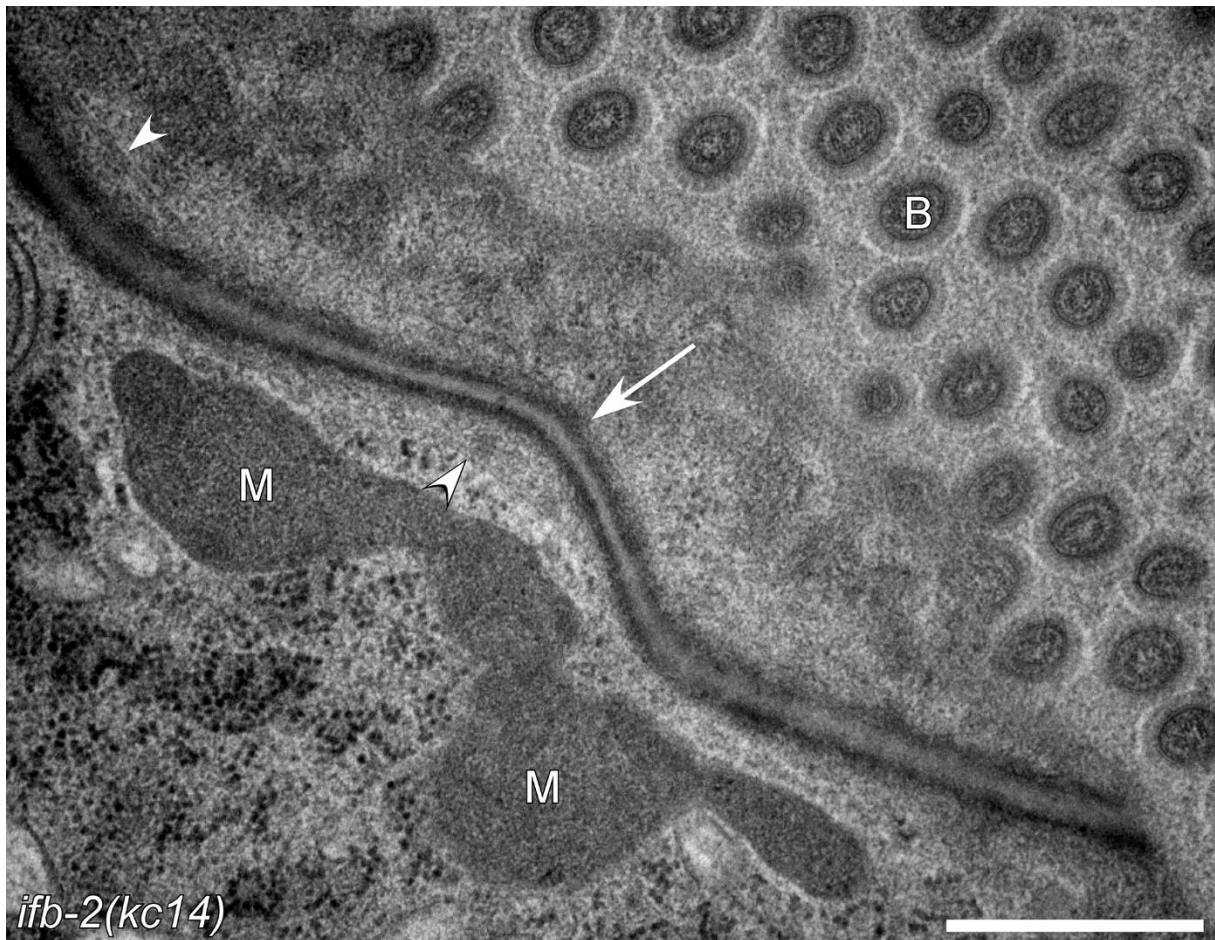

**Fig. S5. The *C. elegans* apical junction lacks visible intermediate filaments in IFB-2 knockout animals.** The electron micrograph is taken from a young adult *ifb-2(kc14)* knockout animal. The obliquely cut *C. elegans* apical junction appears to be unaffected (white arrow) except for a lack of associated IFs. Note multiple microtubules in close vicinity (white arrowheads). B, brush border; M, mitochondria. Scale bar: 500 nm.

**Table S1. List of genes whose expression is either elevated or lowered in isolated intestines of *ifo-1(kc2)*.** Transcriptome analyses were performed on intestines dissected from wild-type N2 and *ifo-1(kc2)* L4 mutants. RNA was prepared from 3 separate experiments for gene chip analysis. The list shows 808 upregulated and 256 downregulated genes (fold change >2; p-value <0.05).

[Click here to download Table S1](#)

**Table S2. List of genes whose expression is either elevated or lowered upon Cry5B treatment in wild-type N2.** Transcriptome analyses were performed in animals grown either on control JM103 or on Cry5B-producing JM103 for 4 days. RNA was prepared from 3 separate experiments for gene chip analysis. The list shows 1829 upregulated and 943 downregulated genes (fold change >2; p-value <0.05).

[Click here to download Table S2](#)

**Table S3. List of genes whose expression is either elevated or lowered upon Cry5B treatment and mutation of the intestinal filament organizer IFO-1.** Transcriptome analyses were performed to define similarities/differences of Cry5B intoxication and endotube impairment. RNA was extracted from N2 grown either on control JM103 or on Cry5B-producing JM103 for 4 days and from dissected intestines of adult wild-type and *ifo-1(kc2)*-mutant animals. RNA was extracted from 3 separate pools in each group for gene chip analysis. Comparison of the genes upregulated in both paradigms or downregulated in both paradigms identified 323 candidates (fold change >2; p-value <0.05).

[Click here to download Table S3](#)

**Table S4. Ontology analysis of genes whose expression is either elevated or lowered by Cry5B treatment and by mutation of the intestinal filament organizer IFO-1.** 54 genes are related to the innate immune response and 11 genes to the defense response to Gram-negative bacteria. Membrane rafts and extracellular space were the most affected cellular compartments, and carbohydrate binding was the most altered metabolic function.

[Click here to download Table S4](#)
